# Supplementary material for: Multimodal luminescence and energy transfer mechanism in a narrowband UVB emitting phosphor system towards futuristic phototherapeutic devices
Source: Royal Society of Chemistry journal article supplement (doi:10.1039/d5ma00810g), 2025-01-01
Supplement: d5ma00810g1.pdf [file d5ma00810g1.pdf]

## Supplementary Information

### Multimodal Luminescence and Energy Transfer Mechanism in Narrowband UVB Emitting Phosphor System towards Futuristic Phototherapeutic Devices

Aachal A. Sharma, Payal P. Pradhan, K.A.K. Durga Prasad, M. Rakshita, Raju  
Pembarthi, and D. Haranath\*

*Luminescence Materials and Devices (LMD) Group, Department of Physics, National  
Institute of Technology Warangal, Hanumakonda 506004, Telangana, INDIA*

Corresponding author's Email: [haranath@nitw.ac.in](mailto:haranath@nitw.ac.in)

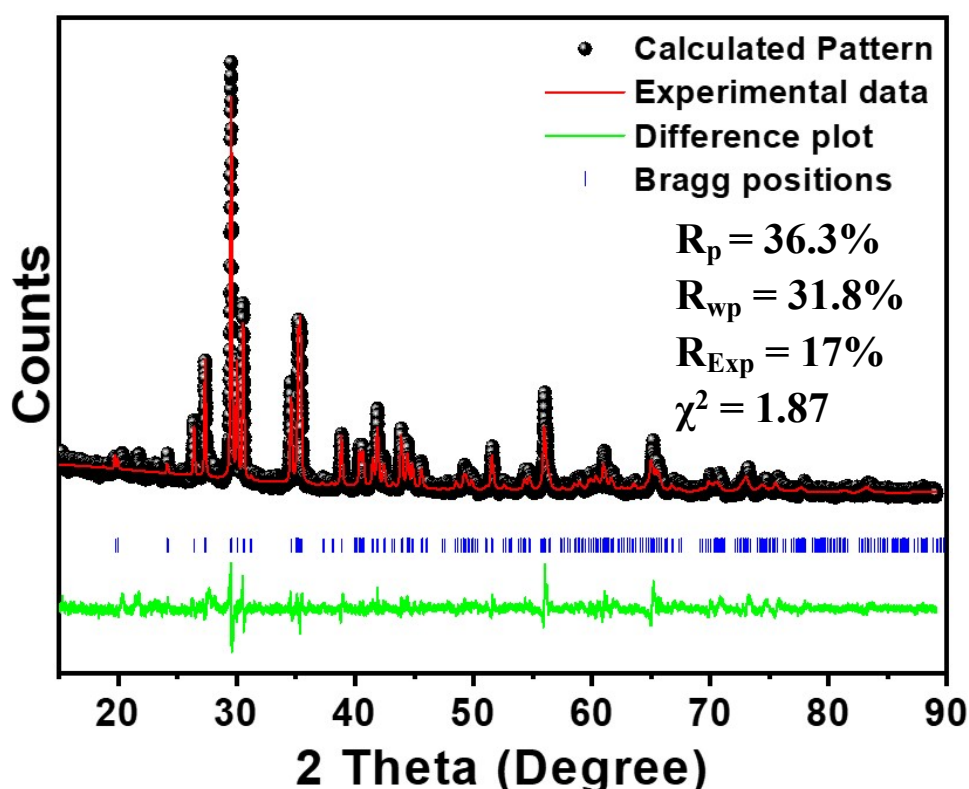

**Figure S1:** Rietveld refinement analysis of  $\text{CaMgSi}_2\text{O}_6:0.05\text{Gd}^{3+}$

The Rietveld refinement was calculated for the main phase of the synthesized sample.

\*Corresponding author. Tel.: +91 995 810 1115; Fax: +91 870 245 9547  
E-mail address: [haranath@nitw.ac.in](mailto:haranath@nitw.ac.in) (D HARANATH)
